# Supplementary material for: Real-world experience and clinical impact of drug-drug interactions in HR+/HER2- advanced breast cancer patients treated with abemaciclib plus endocrine therapy: the AB-ITALY study
Source: Research Square preprint supplement (doi:10.21203/rs.3.rs-3047347/v1), 2023-07-07
Supplement: Supplementary file 1 [file 1e09a470a6c4051a46897507.docx]

Suppl Table 1: UVA of association between Drug-PIN score or light with different AEs

| variable | AEs | p-value |
| --- | --- | --- |
| **Drug-PIN light** | **Diarrhea grade >= 2** | **0.07492** |
| **Drug-PIN light** | **DVT** | **0.09152** |
| Drug-PIN light | Diarrhea any grade | 0.1323 |
| Drug-PIN light | Asthenia grade >1 | 0.1416 |
| Drug-PIN score | Neutropenia grade >1 | 0.1249 |
| **Drug-PIN score** | **ANEMIA any grade** | **0.0675** |
| Drug-PIN score | DVT | 0.1504 |

Suppl Table 1: In the table are reported only the association with a p value <0.15. Association with a p value <0.1 are reported as “trends” and highlighted in bold; DVT: deep vein thrombosis
